# Supplementary material for: Changes in neuroinflammatory biomarkers correlate with disease severity and neuroimaging alterations in patients with COVID-19 neurological complications
Source: PubMed Central journal article supplement — Brain Behav Immun Health. 2024 Jun 13;39:100805. doi: 10.1016/j.bbih.2024.100805 (PMC11253226; doi:10.1016/j.bbih.2024.100805), 2024-06-13
Supplement: mmc1.pdf [file mmc1.pdf]

**SUPPLEMENTARY INFORMATION**

**Barros-Aragão et al.**

**Table of Contents.**

|                                            |          |
|--------------------------------------------|----------|
| <b>SUPPL. FIGURES.....</b>                 | <b>3</b> |
| BARROS-ARAGÃO ET AL., SUPPL. FIG. 1.....   | 3        |
| BARROS-ARAGÃO ET AL., SUPPL. FIG. 2.....   | 4        |
| BARROS-ARAGÃO ET AL., SUPPL. FIG. 3.....   | 5        |
| BARROS-ARAGÃO ET AL., SUPPL. FIG. 4.....   | 6        |
| BARROS-ARAGÃO ET AL., SUPPL. FIG. 5.....   | 7        |
| BARROS-ARAGÃO ET AL., SUPPL. FIG. 6.....   | 8        |
| <b>SUPPL. TABLES.....</b>                  | <b>9</b> |
| BARROS-ARAGÃO ET AL., SUPPL. TABLE 1 ..... | 9        |
| BARROS-ARAGÃO ET AL., SUPPL. TABLE 2 ..... | 10       |
| BARROS-ARAGÃO ET AL., SUPPL. TABLE 3 ..... | 21       |
| BARROS-ARAGÃO ET AL., SUPPL. TABLE 4 ..... | 22       |
| BARROS-ARAGÃO ET AL., SUPPL. TABLE 5 ..... | 23       |

SUPPL. FIGURES

Barros-Aragão et al., Suppl. Fig. 1

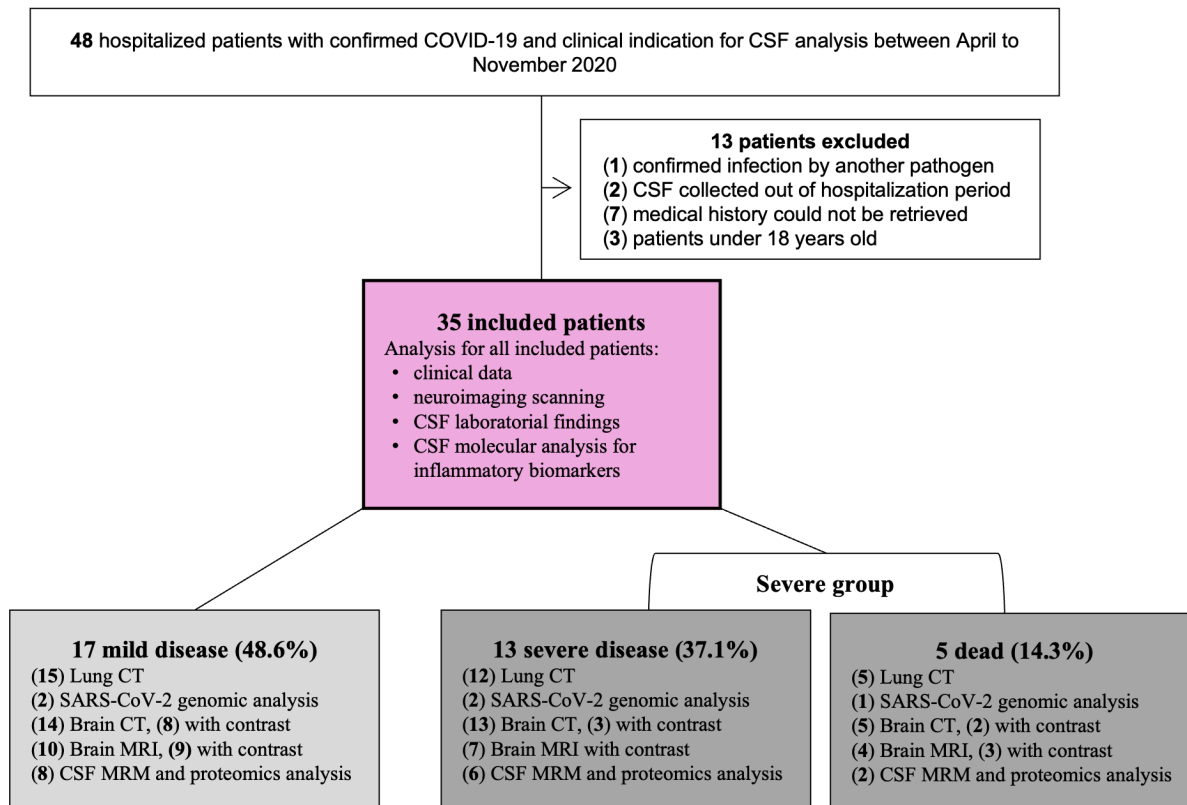

**Suppl. Fig. 1. Study enrolment and analysis.** Abbreviations: (CSF) Cerebrospinal fluid; (CT) Computed tomography; (MRI) Magnetic resonance imaging; (MRM) Multiple Reaction Monitoring.

### Hospitalization

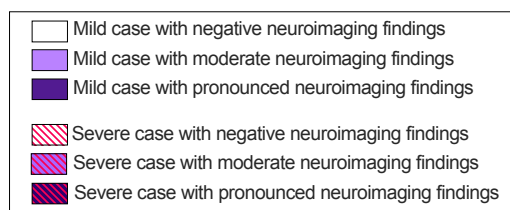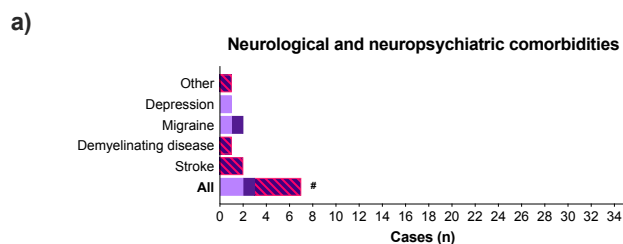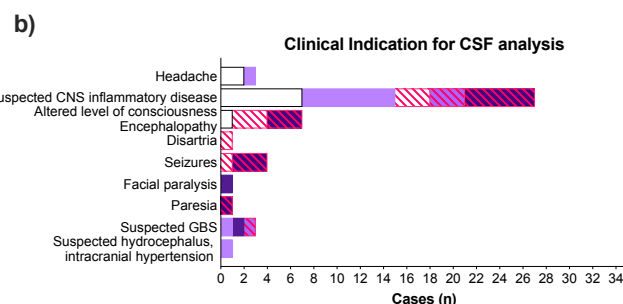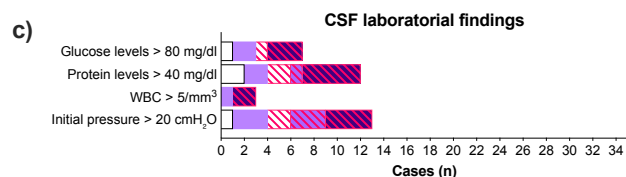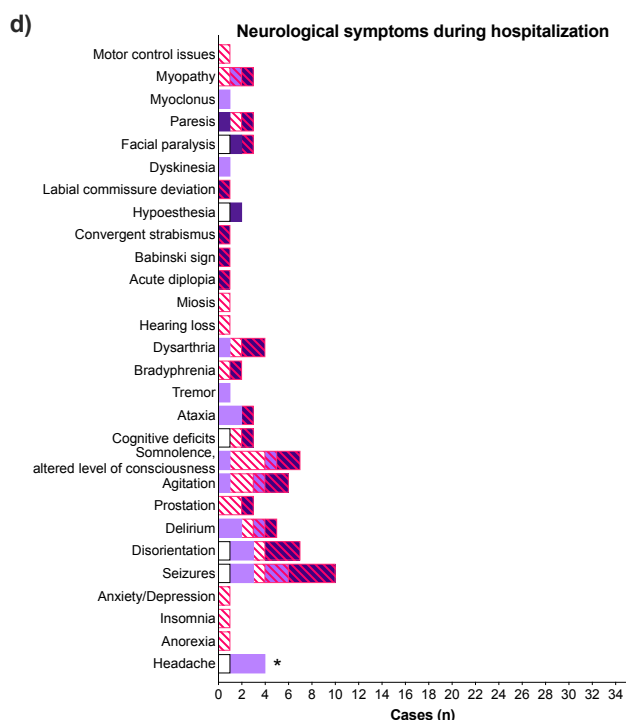

**Suppl. Fig. 2. Patients' neurological comorbidities and cerebrospinal fluid (CSF) analysis concerning COVID-19 severity and neuroimaging findings.**

(a-d) Patients were grouped as presenting negative (white bars), moderate (light purple) or pronounced (dark purple) neuroimaging (CT/MRI) findings related to COVID-19 hospitalisation (n =35). Dashed lines represent severe disease or death. Central Nervous System (CNS) inflammatory diseases include meningitis or encephalitis. (GBS), Guillain-Barré Syndrome. (WBC) White Blood Cells.  $p < 0.05$ , disease severity as an outcome, Fisher's exact test; # $p < 0.017$ , neuroimaging positivity as an outcome, Chi-Square test, followed by pairwise comparison with Bonferroni correction.

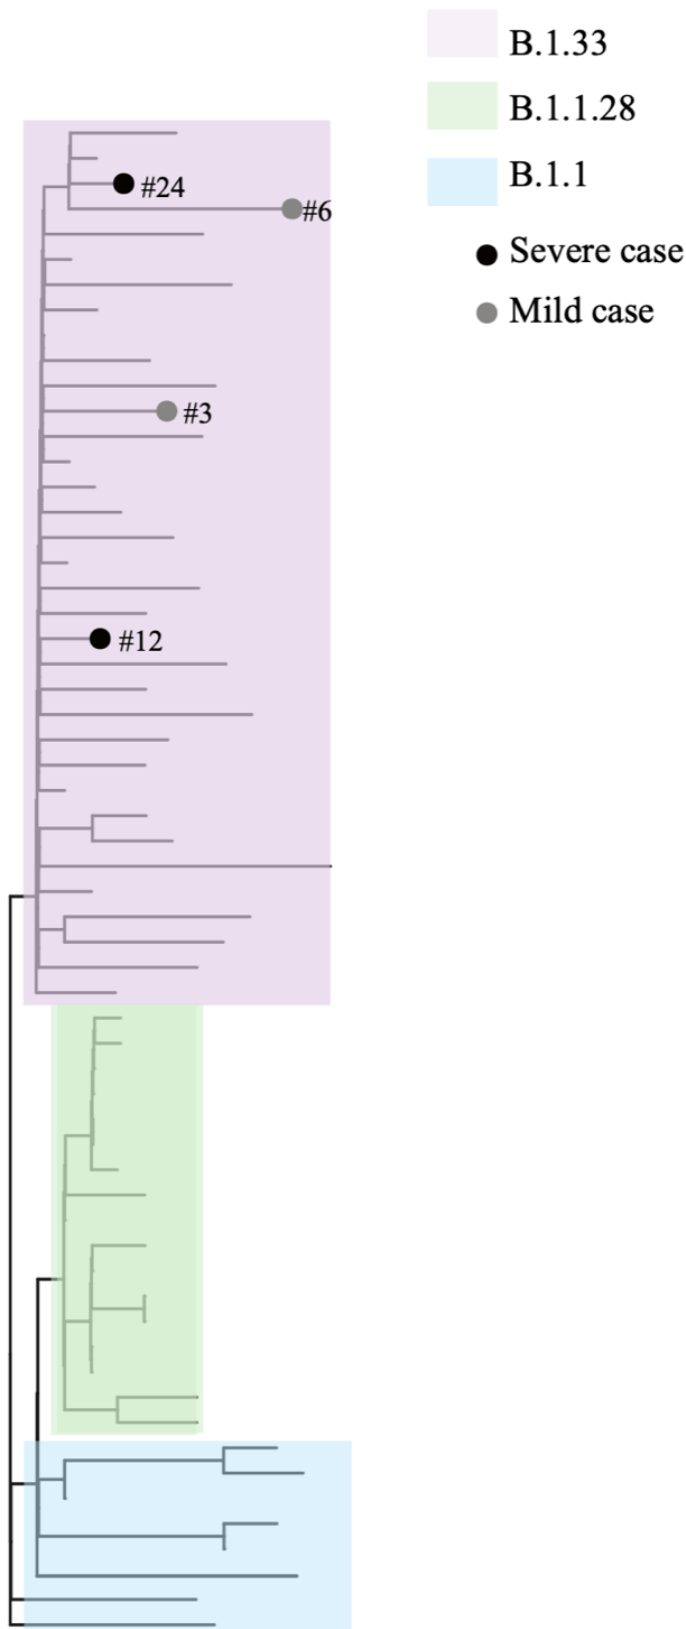

**Suppl. Fig. 3. COVID-19 neurological patients are infected with B.1.1.33 SARS-CoV-2 lineage.**

A maximum-likelihood tree was inferred on IQ-Tree under the GTR+F+I+G4 model with a reference dataset, encompassing sequences from Rio de Janeiro (Brazil) from April 2020 to September 2020 (n =62). Tip circular shape mark sequences characterised in this study, n = 4. Grey symbols indicate mild disease, and black symbols indicate severe or dead cases.

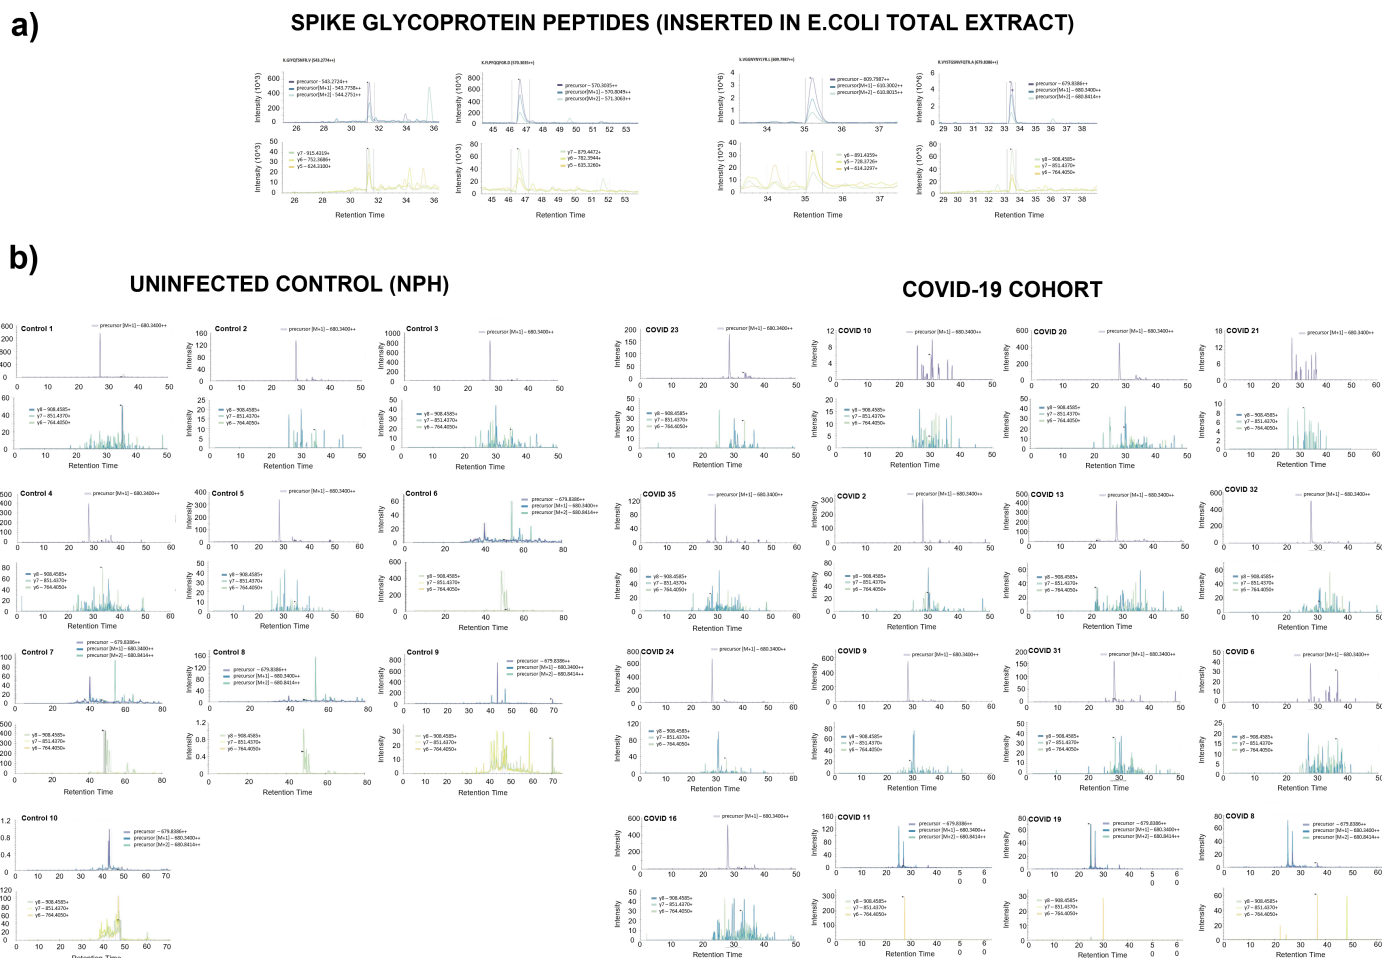

**Suppl. Fig. 4. SARS-CoV-2 spike protein cannot be detected in the cerebrospinal fluid (CSF) of COVID-19 neurological patients.**

(a) Peptide ion transitions validation of a recombinant SARS-CoV-2 spike protein inserted into an *E. coli* protein extract. Skyline aligned the parent ion transition with the fragment transitions and exported the SRM method. (b) A representative panel of the spike protein absence in all the CSF samples was analysed by SRM. Only one of the four transitions used to construct the SRM method is presented, showing that no trace of the spike protein was not found in CSF samples. N = 10 controls; 16 COVID-19.

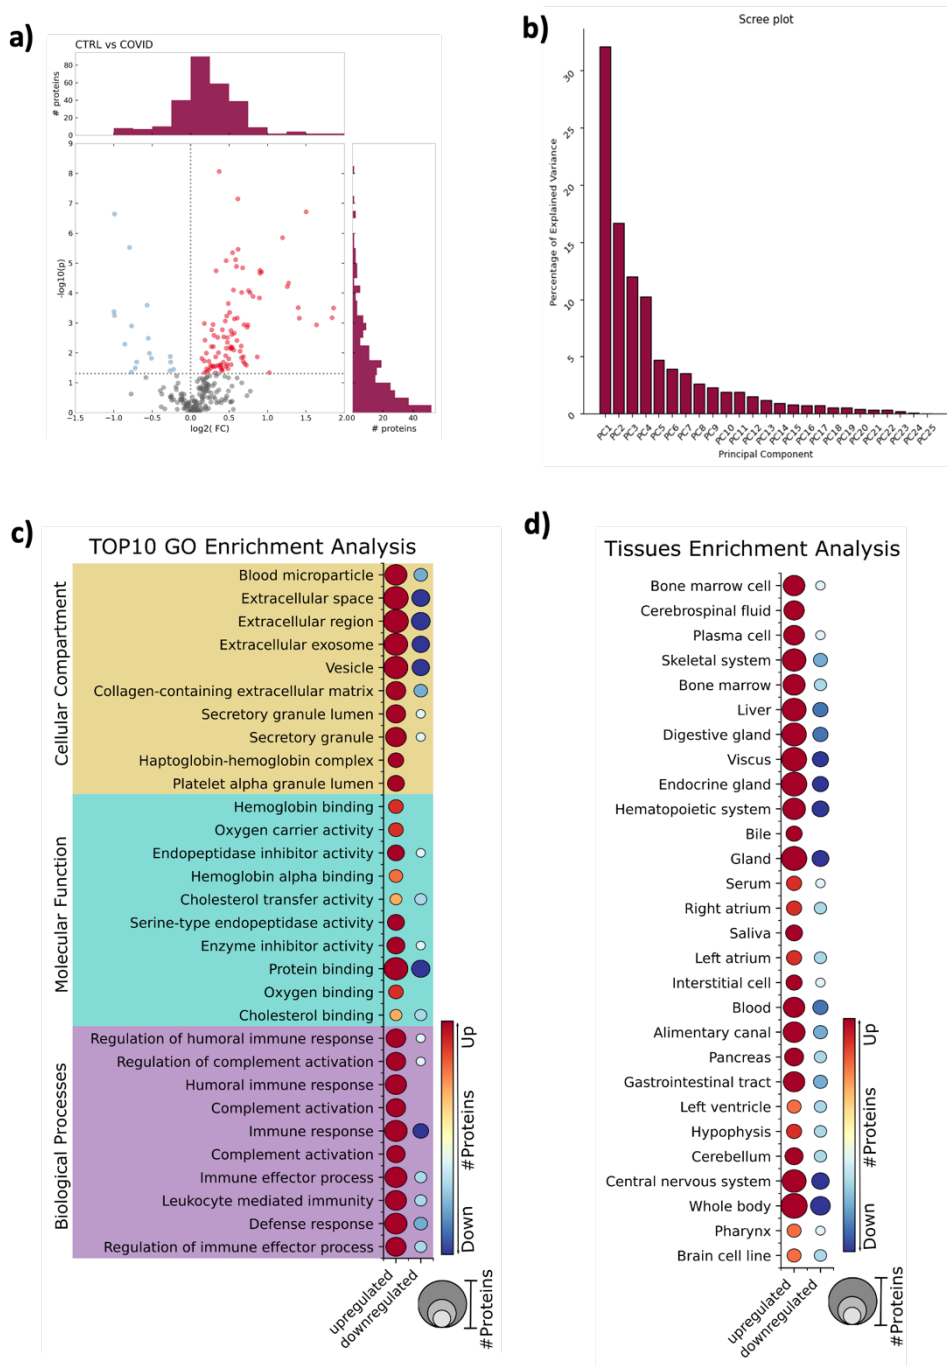

**Suppl. Fig. 5. Cerebral Spinal fluid (CSF) proteomic analysis.**

(a) Gene ontology (GO) analysis of the dysregulated proteins found in the CSF of COVID-19 patients against control. (b) Tissue enrichment analysis of the statistically significant dysregulated proteins found in COVID-19 patients' CSF, showing the overlap between tissue protein markers and the proteins found in our dataset. (c) Volcano plot showing the protein abundance distribution between controls and COVID-19 patients considering the fold change and the p-value (cut-off > 0.05). Normal-pressure hydrocephalus CSF samples are used as non-infectious control. N = 10 controls; 16 COVID-19.

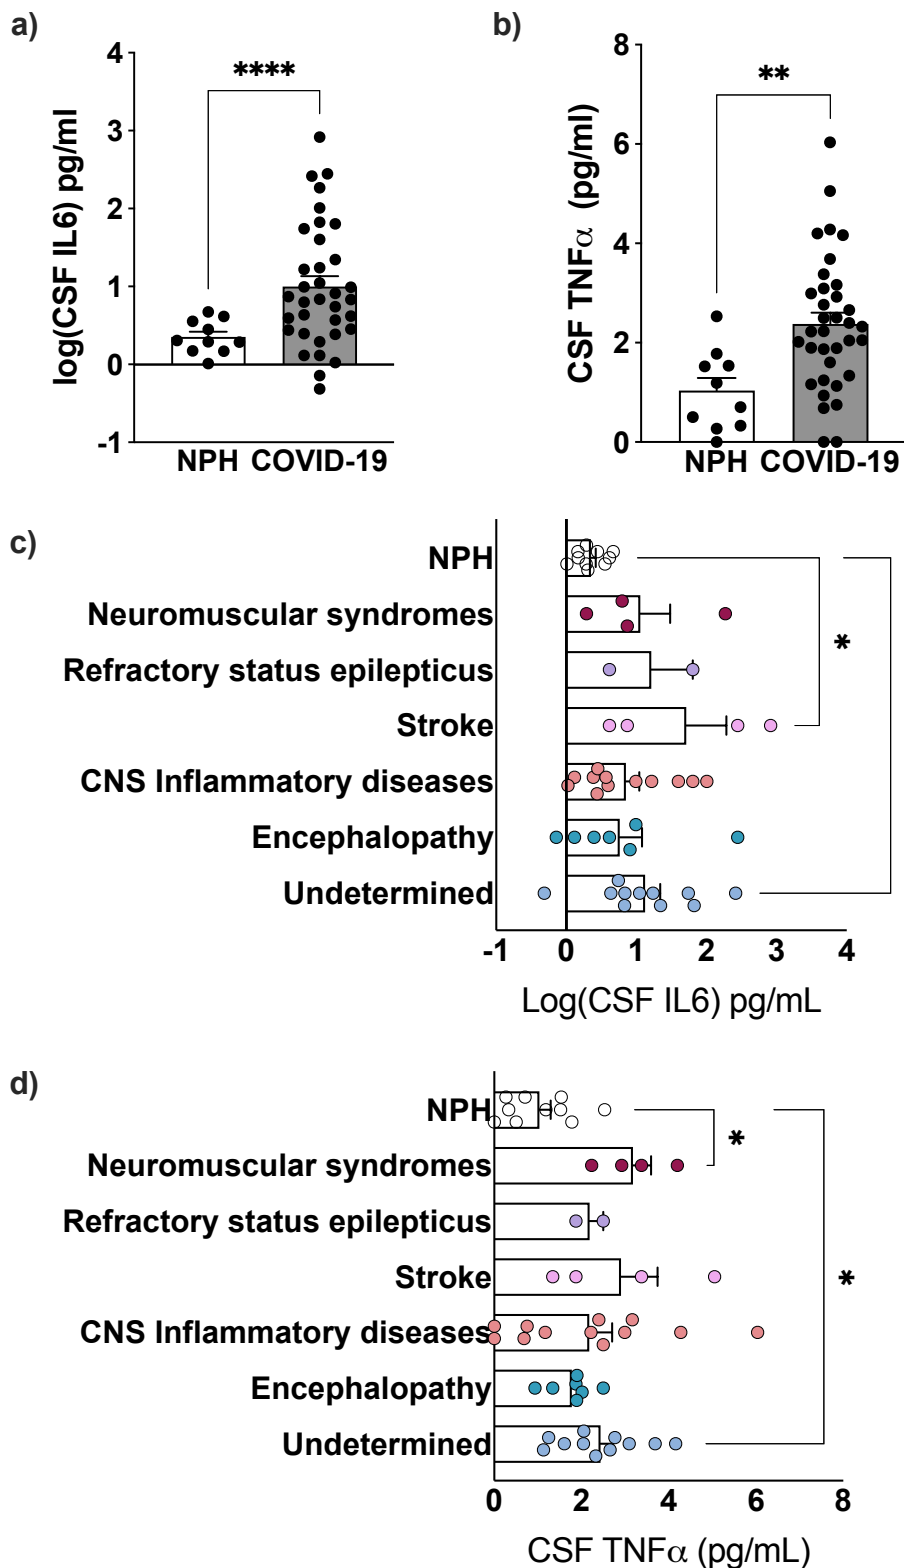

Barros-Aragão et al, Suppl. Fig. 6

Suppl. Fig. 6. COVID-19 neurological patients present higher CSF IL6 and TNF $\alpha$  levels than uninfected controls. Data are shown as the mean and SEM. Symbols indicate individual patients. \* $p < 0.05$ , \*\* $p < 0.01$ , t-test with Welch's correction or Kruskal-Wallis followed by Dunn's multiple comparison test compared to uninfected control (NPH, Normal Pressure Hydrocephalus Patients).



## SUPPL. TABLES

### Barros-Aragão et al., Suppl. Table 1

#### Suppl. Table. 1. Patient inclusion and exclusion criteria.

| <b>Inclusion criteria</b> |                                                                                                                        |
|---------------------------|------------------------------------------------------------------------------------------------------------------------|
| 1.                        | Hospitalisation due to COVID-19 (confirmed).                                                                           |
| 2.                        | Clinical indication for cerebrospinal fluid (CSF) sampling.                                                            |
| <b>Exclusion criteria</b> |                                                                                                                        |
| 1.                        | COVID-19 tested negative or unavailable.                                                                               |
| 2.                        | CSF was collected out of the hospitalisation period.                                                                   |
| 3.                        | Confirmed infection by another pathogen unrelated to this study or concomitant infection by another relevant pathogen. |
| 4.                        | Medical history could not be retrieved.                                                                                |
| 5.                        | Children or adolescent patients (younger than 18 years old).                                                           |

Barros-Aragão et al., Suppl. Table 2

Barros-Aragão et al., Suppl. Table 2. Individualized demographics, clinical data, neuroimaging, and sample molecular analysis of COVID-19 patients presenting neurological symptoms.

| Patient                                                | #1                                                                                                   | #2                                                                                                     | #3                                                         | #4                                                    | #5                            |
|--------------------------------------------------------|------------------------------------------------------------------------------------------------------|--------------------------------------------------------------------------------------------------------|------------------------------------------------------------|-------------------------------------------------------|-------------------------------|
| Age (years)                                            | 38                                                                                                   | 47                                                                                                     | 47                                                         | 52                                                    | 48                            |
| Sex                                                    | F                                                                                                    | f                                                                                                      | f                                                          | m                                                     | f                             |
| Hospitalisation period (days)                          | 27                                                                                                   | 3                                                                                                      | 7                                                          | 1                                                     | 7                             |
| Disease severity (score)                               | Mild (3)                                                                                             | Mild (3)                                                                                               | Mild (3)                                                   | Mild (3)                                              | Mild (4)                      |
| Chest CT Covid-19 pulmonary involvement (%)            | < 25                                                                                                 | < 25                                                                                                   | < 25                                                       | < 25                                                  | 50-75                         |
| Blood analysis                                         |                                                                                                      |                                                                                                        |                                                            |                                                       |                               |
| C-Reactive Protein (mg/dl)                             | 16.9                                                                                                 | 0.5                                                                                                    | 0.5                                                        | 0.5                                                   | 8.7                           |
| D-dimer (ng/ml)                                        | 2143.8                                                                                               | 660                                                                                                    | 1630                                                       | 749                                                   | 1131.8                        |
| Comorbidities                                          | Ankylosing spondylitis.                                                                              | Hypertension, heart failure, previous bariatric surgery, obesity, chronic renal disease, and migraine. | Obesity, previous bariatric surgery, hepatitis C, smoking. | Hypertension.                                         | dyslipidemia, hypothyroidism. |
| Neurological symptoms at admission                     | Headache, altered level of consciousness, fatigue, dizziness, neck stiffness, prostration, anorexia. | Headache, fatigue, malaise, prostration, nausea/vomiting.                                              | Headache, fatigue, malaise.                                | Headache, nausea/vomiting, dizziness, photophobia.    | None.                         |
| Clinical complaint/complication during hospitalisation | Drug-induced hypersensitivity syndrome, hepatic dysfunction.                                         | Headache.                                                                                              | headache.                                                  | Headache.                                             | Headache and sepsis.          |
| Clinical indication for CSF analysis                   | Headache and suspected meningoencephalitis.                                                          | Headache and suspected meningoencephalitis.                                                            | Headache and suspected encephalitis.                       | Intracranial hypertension and suspected encephalitis. | Suspected meningitis.         |
| Neurological diagnosis                                 | Undetermined                                                                                         | Undetermined                                                                                           | Undetermined                                               | Undetermined                                          | Undetermined                  |
|                                                        | NEGATIVE                                                                                             | MODERATE                                                                                               | NEGATIVE                                                   | MODERATE                                              | MODERATE                      |

|                                                                  |                                                      |                                                                                                                                                                                   |                                                    |                                                                                                                                                                         |                                                                                                                                                                                                     |
|------------------------------------------------------------------|------------------------------------------------------|-----------------------------------------------------------------------------------------------------------------------------------------------------------------------------------|----------------------------------------------------|-------------------------------------------------------------------------------------------------------------------------------------------------------------------------|-----------------------------------------------------------------------------------------------------------------------------------------------------------------------------------------------------|
| <b>Neuroimaging findings for COVID-19 and imaging modalities</b> | Brain CT and MR, non-enhanced. MR brain angiography. | Brain MR, contrast-enhanced. Brain CT, non-enhanced. Cerebral MR angiography. Mild signs of intracranial hypertension (optic nerves tortuosity with enlarged subarachnoid space). | Brain CT, contrast-enhanced. Brain CT angiography. | Brain MR, contrast-enhanced. Cerebral MR angiography. Mild signs of intracranial hypertension (enlarged Meckel caves; slight optic nerves enlarged subarachnoid space). | Brain CT, contrast-enhanced. Signs of intracranial hypertension (enlarged Meckel caves; optic nerves enlarged subarachnoid space; partial empty sella; bilateral venous transverse sinus stenosis). |
| <b>CSF analysis</b>                                              |                                                      |                                                                                                                                                                                   |                                                    |                                                                                                                                                                         |                                                                                                                                                                                                     |
| <b>WBC cells/mm<sup>3</sup></b>                                  | 1                                                    | 1                                                                                                                                                                                 | 1                                                  | 3                                                                                                                                                                       | 1                                                                                                                                                                                                   |
| <b>Protein mg/dL</b>                                             | 41                                                   | 34                                                                                                                                                                                | 44                                                 | 71                                                                                                                                                                      | 17                                                                                                                                                                                                  |
| <b>Glucose mg/dL</b>                                             | 59                                                   | 60                                                                                                                                                                                | 61                                                 | 46                                                                                                                                                                      | 70                                                                                                                                                                                                  |
| <b>IL6 pg/mL</b>                                                 | 55                                                   | 4.3                                                                                                                                                                               | 0.5                                                | 11.1                                                                                                                                                                    | 5.5                                                                                                                                                                                                 |
| <b>TNF<math>\alpha</math> pg/mL</b>                              | 4.2                                                  | 1.3                                                                                                                                                                               | 2.3                                                | 3.7                                                                                                                                                                     | 2.05                                                                                                                                                                                                |
| <b>Other</b>                                                     | ..                                                   | Included for CSF proteomics analysis.                                                                                                                                             | ..                                                 | ..                                                                                                                                                                      | ..                                                                                                                                                                                                  |

| <b>Patient</b>                                     | <b>#6</b>                                               | <b>#7</b>                                                           | <b>#8</b>                                                   | <b>#9</b>                                                          | <b>#10</b>                      |
|----------------------------------------------------|---------------------------------------------------------|---------------------------------------------------------------------|-------------------------------------------------------------|--------------------------------------------------------------------|---------------------------------|
| <b>Age (years)</b>                                 | 29                                                      | 43                                                                  | 44                                                          | 60                                                                 | 68                              |
| <b>Sex</b>                                         | F                                                       | F                                                                   | f                                                           | m                                                                  | M                               |
| <b>Hospitalisation period (days)</b>               | 2                                                       | 6                                                                   | 3                                                           | 11                                                                 | 12                              |
| <b>Disease severity (score)</b>                    | Mild (3)                                                | Mild (3)                                                            | Mild (3)                                                    | Mild (3)                                                           | Mild (3)                        |
| <b>Chest CT Covid-19 pulmonary involvement (%)</b> | 0                                                       | 0                                                                   | NA                                                          | < 25                                                               | <25                             |
| <b>Blood analysis</b>                              |                                                         |                                                                     |                                                             |                                                                    |                                 |
| <b>C-Reactive Protein (mg/dl)</b>                  | 0.7                                                     | 3.2                                                                 | 0.6                                                         | 0.68                                                               | 6.2                             |
| <b>D-dimer (ng/ml)</b>                             | 282                                                     | 353                                                                 | 282                                                         | 3957                                                               | 1269                            |
| <b>Comorbidities</b>                               | None                                                    | Obesity, previous bariatric surgery, hypothyroidism, and depression | None                                                        | Obesity, dyslipidemia, smoking                                     | None                            |
| <b>Neurological symptoms at admission</b>          | Headache, anosmia, ageusia, fatigue, nausea, rotational | Headache, seizures, fatigue/malaise, vomiting/nausea.               | Headache, confusion, anosmia, fatigue/malaise, paresthesia, | Ataxia, dysarthria and dyslalia, lip commissure deviation, tremor. | Altered level of consciousness. |

|                                                                  |                                                                                                                                                                                         |                                                                                                                                                                                                              |                                                                                        |                                                                                                                                                                                                                              |                                                                                                                                                        |
|------------------------------------------------------------------|-----------------------------------------------------------------------------------------------------------------------------------------------------------------------------------------|--------------------------------------------------------------------------------------------------------------------------------------------------------------------------------------------------------------|----------------------------------------------------------------------------------------|------------------------------------------------------------------------------------------------------------------------------------------------------------------------------------------------------------------------------|--------------------------------------------------------------------------------------------------------------------------------------------------------|
|                                                                  | photophobia/phonophobia<br>, syncope.                                                                                                                                                   |                                                                                                                                                                                                              | dysarthria, urinary<br>incontinence.                                                   |                                                                                                                                                                                                                              |                                                                                                                                                        |
| <b>Clinical complaint/complication during hospitalisation</b>    | None.                                                                                                                                                                                   | Seizures, delirium, agitation, somnolence, altered level of consciousness.                                                                                                                                   | Disorientation, paresthesia, cognitive deficits.                                       | Appendicular and gait ataxia, dysarthria, and tremor. Deep venous thrombosis.                                                                                                                                                | Disorientation, ataxia, recent onset dyskinesia, and myoclonus.                                                                                        |
| <b>Clinical indication for CSF analysis</b>                      | Suspected encephalitis.                                                                                                                                                                 | Suspected encephalitis.                                                                                                                                                                                      | Suspected encephalomyelitis.                                                           | Suspected encephalitis /Guillain-Barré syndrome.                                                                                                                                                                             | Suspected encephalitis.                                                                                                                                |
| <b>Neurological diagnosis</b>                                    | <b>Possible myelitis</b>                                                                                                                                                                | <b>Encephalitis</b>                                                                                                                                                                                          | <b>Encephalomyelitis</b>                                                               | <b>Probable encephalitis</b>                                                                                                                                                                                                 | <b>Probable encephalitis</b>                                                                                                                           |
| <b>Neuroimaging findings for COVID-19 and imaging modalities</b> | MODERATE<br><br>Brain CT and MR, contrast-enhanced.<br><br>Cerebral MR angiography. Mild signs of intracranial hypertension (optic nerves tortuosity with enlarged subarachnoid space). | MODERATE<br><br>Brain MR, contrast-enhanced. Cerebral MR angiography. Mild signs of intracranial hypertension (slight enlarged Meckel caves; mild optic nerves tortuosity with enlarged subarachnoid space). | NEGATIVE<br><br>Brain and spine MR, contrast-enhanced.<br><br>Cerebral MR angiography. | MODERATE<br><br>Brain and cervical spine MR, contrast-enhanced.<br><br>Brain CT, contrast-enhanced. Mild signs of intracranial hypertension (enlarged Meckel caves; slight downward displacement of the cerebellar tonsils). | MODERATE<br><br>Brain CT, contrast-enhanced. Signs of intracranial hypertension (enlarged Meckel caves; partial empty sella; optic nerves tortuosity). |
| <b>CSF analysis</b>                                              |                                                                                                                                                                                         |                                                                                                                                                                                                              |                                                                                        |                                                                                                                                                                                                                              |                                                                                                                                                        |
| <b>WBC cells/mm<sup>3</sup></b>                                  | 1                                                                                                                                                                                       | 1                                                                                                                                                                                                            | 1                                                                                      | 2                                                                                                                                                                                                                            | 2                                                                                                                                                      |
| <b>Protein mg/dL</b>                                             | 2                                                                                                                                                                                       | 29                                                                                                                                                                                                           | 28                                                                                     | 37                                                                                                                                                                                                                           | 34                                                                                                                                                     |
| <b>Glucose mg/dL</b>                                             | 54                                                                                                                                                                                      | <b>90</b>                                                                                                                                                                                                    | 56                                                                                     | 56                                                                                                                                                                                                                           | 63                                                                                                                                                     |
| <b>IL6 pg/mL</b>                                                 | 1.95                                                                                                                                                                                    | 2.4                                                                                                                                                                                                          | 1.05                                                                                   | 1.3                                                                                                                                                                                                                          | 3.7                                                                                                                                                    |
| <b>TNF<math>\alpha</math> pg/mL</b>                              | 4.2                                                                                                                                                                                     | 2.4                                                                                                                                                                                                          | Undetermined                                                                           | 0.68                                                                                                                                                                                                                         | 1.17                                                                                                                                                   |
| <b>Other</b>                                                     | Included for CSF proteomics analysis.                                                                                                                                                   | ..                                                                                                                                                                                                           | Included for CSF proteomics analysis.                                                  | Included for CSF proteomics analysis.                                                                                                                                                                                        | Included for CSF proteomics analysis.                                                                                                                  |

| <b>Patient</b>                       | <b>#11</b> | <b>#12</b> | <b>#13</b> | <b>#14</b> | <b>#15</b> |
|--------------------------------------|------------|------------|------------|------------|------------|
| <b>Age (years)</b>                   | 73         | 81         | 48         | 50         | 51         |
| <b>Sex</b>                           | m          | M          | M          | f          | M          |
| <b>Hospitalisation period (days)</b> | 14         | 10         | 30         | 56         | 83         |
| <b>Disease severity (score)</b>      | Mild (3)   | Severe (5) | Severe (6) | Severe (7) | Severe (7) |

|                                                                  |                                                                                                                                                                                                                                               |                                                                                    |                                                                  |                                                                                                                                                                                                                                  |                                                                                                                                                                                            |
|------------------------------------------------------------------|-----------------------------------------------------------------------------------------------------------------------------------------------------------------------------------------------------------------------------------------------|------------------------------------------------------------------------------------|------------------------------------------------------------------|----------------------------------------------------------------------------------------------------------------------------------------------------------------------------------------------------------------------------------|--------------------------------------------------------------------------------------------------------------------------------------------------------------------------------------------|
| <b>Chest CT Covid-19 pulmonary involvement (%)</b>               | < 25                                                                                                                                                                                                                                          | < 25                                                                               | < 25                                                             | 25-50                                                                                                                                                                                                                            | < 25                                                                                                                                                                                       |
| <b>Blood analysis</b>                                            |                                                                                                                                                                                                                                               |                                                                                    |                                                                  |                                                                                                                                                                                                                                  |                                                                                                                                                                                            |
| <b>C-Reactive Protein (mg/dl)</b>                                | 0.8                                                                                                                                                                                                                                           | <b>30.55</b>                                                                       | 3.5                                                              | 4.94                                                                                                                                                                                                                             | <b>15.7</b>                                                                                                                                                                                |
| <b>D-dimer (ng/ml)</b>                                           | 674.2                                                                                                                                                                                                                                         | 803                                                                                | 1105                                                             | 501                                                                                                                                                                                                                              | <b>1759</b>                                                                                                                                                                                |
| <b>Comorbidities</b>                                             | Chronic hematologic and lung diseases, cancer (lymphoma).                                                                                                                                                                                     | Hypertension, coronary artery disease, congenital heart disease, diabetes, cancer. | Hypertension.                                                    | Hypertension, obesity, diabetes, CNS demyelinating disease.                                                                                                                                                                      | Hypertension.                                                                                                                                                                              |
| <b>Neurological symptoms at admission</b>                        | Paratonia, confusion/alterd level of consciousness, fatigue, dysarthria.                                                                                                                                                                      | Confusion/alterd level of consciousness, nausea/vomiting.                          | Anosmia.                                                         | Paresis and afasia.                                                                                                                                                                                                              | Severe psychomotor agitation.                                                                                                                                                              |
| <b>Clinical complaint/complication during hospitalisation</b>    | Seizures, disorientation, delirium.                                                                                                                                                                                                           | Seizures.                                                                          | Disorientation, clonus.                                          | Disorientation, agitation, hemiparesis, and sepsis.                                                                                                                                                                              | Seizures. Bacterial pneumonia                                                                                                                                                              |
| <b>Clinical indication for CSF analysis</b>                      | Suspected encephalitis.                                                                                                                                                                                                                       | Seizures and suspected encephalitis.                                               | Dysarthria and altered level of consciousness.                   | Seizures, altered level of consciousness, suspected encephalitis.                                                                                                                                                                | Suspected encephalitis.                                                                                                                                                                    |
| <b>Neurological diagnosis</b>                                    | <b>Encephalitis</b>                                                                                                                                                                                                                           | <b>Probable encephalitis</b>                                                       | <b>Encephalitis</b>                                              | <b>Acute disseminated encephalomyelitis (ADEM)</b>                                                                                                                                                                               | <b>Encephalitis</b>                                                                                                                                                                        |
| <b>Neuroimaging findings for COVID-19 and imaging modalities</b> | MODERATE<br>Brain and cervical spine MR, contrast-enhanced.<br>Brain CT, contrast-enhanced. Signs of intracranial hypertension (enlarged Meckel caves; partial empty sella; slight optic nerves tortuosity with enlarged subarachnoid space). | NEGATIVE<br>Brain CT, non-enhanced. Mild optic nerves enlarged subarachnoid space. | NEGATIVE<br>Brain CT, non-enhanced. Brain MR, contrast-enhanced. | PRONOUNCED<br>Brain and spine MR, contrast-enhanced.<br>Brain CT, contrast-enhanced. Multiple demyelinating lesions, some with signs of activity (enhancing / DWi restriction). Slight optic nerves enlarged subarachnoid space. | MODERATE<br>Brain CT, non-enhanced. Signs of intracranial hypertension (slight optic nerves tortuosity with enlarged subarachnoid space; downward displacement of the cerebellar tonsils). |
| <b>CSF analysis</b>                                              |                                                                                                                                                                                                                                               |                                                                                    |                                                                  |                                                                                                                                                                                                                                  |                                                                                                                                                                                            |
| <b>WBC cells/mm<sup>3</sup></b>                                  | <b>25</b>                                                                                                                                                                                                                                     | 1                                                                                  | 1                                                                | 1                                                                                                                                                                                                                                | 2                                                                                                                                                                                          |
| <b>Protein mg/dL</b>                                             | <b>100</b>                                                                                                                                                                                                                                    | 37                                                                                 | 3                                                                | <b>57</b>                                                                                                                                                                                                                        | 35                                                                                                                                                                                         |
| <b>Glucose mg/dL</b>                                             | <b>81</b>                                                                                                                                                                                                                                     | 69                                                                                 | 74                                                               | <b>144</b>                                                                                                                                                                                                                       | 60                                                                                                                                                                                         |
| <b>IL6 pg/mL</b>                                                 | 40                                                                                                                                                                                                                                            | 3.9                                                                                | 2.8                                                              | 101.6                                                                                                                                                                                                                            | 16.5                                                                                                                                                                                       |
| <b>TNFα pg/mL</b>                                                | 4.28                                                                                                                                                                                                                                          | 3                                                                                  | Undetermined                                                     | 2.2                                                                                                                                                                                                                              | 3.2                                                                                                                                                                                        |

|       |                                       |    |                                       |                                       |    |
|-------|---------------------------------------|----|---------------------------------------|---------------------------------------|----|
| Other | Included for CSF proteomics analysis. | .. | Included for CSF proteomics analysis. | Included for CSF proteomics analysis. | .. |
|-------|---------------------------------------|----|---------------------------------------|---------------------------------------|----|

| Patient                                                | #16*                                                                                                                                                                  | #17                                                                                                               | #18                          | #19                                                             | #20                                                                                                                                                  |
|--------------------------------------------------------|-----------------------------------------------------------------------------------------------------------------------------------------------------------------------|-------------------------------------------------------------------------------------------------------------------|------------------------------|-----------------------------------------------------------------|------------------------------------------------------------------------------------------------------------------------------------------------------|
| Age (years)                                            | 65                                                                                                                                                                    | 37                                                                                                                | 45                           | 79                                                              | 53                                                                                                                                                   |
| Sex                                                    | M                                                                                                                                                                     | M                                                                                                                 | M                            | F                                                               | M                                                                                                                                                    |
| Hospitalisation period (days)                          | 21                                                                                                                                                                    | 4                                                                                                                 | 17                           | 12                                                              | 31                                                                                                                                                   |
| Disease severity (score)                               | Severe (7)                                                                                                                                                            | Mild (3)                                                                                                          | Mild (4)                     | Severe (5)                                                      | Severe (6)                                                                                                                                           |
| Chest CT Covid-19 pulmonary involvement (%)            | 0                                                                                                                                                                     | < 25                                                                                                              | NA                           | < 25                                                            | NA                                                                                                                                                   |
| <b>Blood analysis</b>                                  |                                                                                                                                                                       |                                                                                                                   |                              |                                                                 |                                                                                                                                                      |
| C-Reactive Protein (mg/dl)                             | 5.6                                                                                                                                                                   | 0.03                                                                                                              | 1.6                          | 5.9                                                             | 3.4                                                                                                                                                  |
| D-dimer (ng/ml)                                        | 599                                                                                                                                                                   | 119.22                                                                                                            | <b>2058.8</b>                | 1471                                                            | <b>4765</b>                                                                                                                                          |
| Comorbidities                                          | Coronary artery disease, hypothyroidism.                                                                                                                              | None.                                                                                                             | Hypertension and alcoholism. | Fibromyalgia and localized scleroderma.                         | Hypertension and diabetes.                                                                                                                           |
| Neurological symptoms at admission                     | Nausea/vomiting.                                                                                                                                                      | Altered level of consciousness, catatonia, insomnia, aggressiveness, psychomotor agitation, prostration, syncope. | Disorientation.              | Altered level of consciousness/confusion, fatigue, prostration. | Headache and altered level of consciousness/confusion.                                                                                               |
| Clinical complaint/complication during hospitalisation | Somnolence, mild ataxia, dysarthria, acute diplopia, bilateral Babinski sign, convergent strabismus, and cognitive deficits. Venous thrombosis and urinary retention. | None.                                                                                                             | Bacteremia.                  | Delirium, agitation, somnolence. Hypotension.                   | Disorientation, agitation, delirium, altered level of consciousness, dysarthria, facial paralysis /lip commissure deviation. Ventricular arrhythmia. |
| Clinical indication for CSF analysis                   | Suspected encephalitis.                                                                                                                                               | Altered level of consciousness and suspected encephalitis.                                                        | Suspected encephalitis.      | Suspected encephalitis.                                         | Suspected posterior reversible encephalopathy syndrome (PRES).                                                                                       |
| Neurological diagnosis                                 | <b>Meningoencephalitis</b>                                                                                                                                            | <b>Encephalopathy</b>                                                                                             | <b>Encephalopathy</b>        | <b>Encephalopathy</b>                                           | <b>Stroke and encephalopathy</b>                                                                                                                     |
|                                                        | PRONOUNCED                                                                                                                                                            | NEGATIVE                                                                                                          | NEGATIVE                     | MODERATE                                                        | PRONOUNCED                                                                                                                                           |

|                                                                  |                                                                                                                                                                                             |                         |                         |                                                                                                                                                                                                                                                                                                                                                                 |                                                                                                                                  |
|------------------------------------------------------------------|---------------------------------------------------------------------------------------------------------------------------------------------------------------------------------------------|-------------------------|-------------------------|-----------------------------------------------------------------------------------------------------------------------------------------------------------------------------------------------------------------------------------------------------------------------------------------------------------------------------------------------------------------|----------------------------------------------------------------------------------------------------------------------------------|
| <b>Neuroimaging findings for COVID-19 and imaging modalities</b> | Brain CT, non-enhanced.<br>Brain MR, contrast-enhanced. Cerebral MR angiography. Mild dural enhancement evolving to demyelinating lesions. Slight optic nerves enlarged subarachnoid space. | Brain CT, non-enhanced. | Brain CT, non-enhanced. | Brain CT, non-enhanced.<br>Brain MR, contrast-enhanced. Cerebral MR angiography. Signs of intracranial hypertension (slight enlarged Meckel caves; optic nerves tortuosity with enlarged subarachnoid space; partial empty sella). Cerebral microangiopathy due to chronic small vessel disease (Fazekas 3). Hydrocephalus with probable transependymal oedema. | Brain CT, contrast-enhanced.<br>Mesencephalic, left occipital, and right cerebellar hipodensities. Posterior circulation stroke. |
|                                                                  | <b>CSF analysis</b>                                                                                                                                                                         |                         |                         |                                                                                                                                                                                                                                                                                                                                                                 |                                                                                                                                  |
| <b>WBC cells/mm<sup>3</sup></b>                                  | <b>65</b>                                                                                                                                                                                   | 1                       | 2                       | 1                                                                                                                                                                                                                                                                                                                                                               | 2                                                                                                                                |
| <b>Protein mg/dL</b>                                             | <b>67</b>                                                                                                                                                                                   | 33                      | 38                      | 26                                                                                                                                                                                                                                                                                                                                                              | <b>69</b>                                                                                                                        |
| <b>Glucose mg/dL</b>                                             | 63                                                                                                                                                                                          | 69                      | 54                      | 52                                                                                                                                                                                                                                                                                                                                                              | 63                                                                                                                               |
| <b>IL6 pg/mL</b>                                                 | 9.8                                                                                                                                                                                         | 2.5                     | 1.3                     | 9.9                                                                                                                                                                                                                                                                                                                                                             | 280.8                                                                                                                            |
| <b>TNF<math>\alpha</math> pg/mL</b>                              | 6.0                                                                                                                                                                                         | 2.5                     | 2.0                     | 1.9                                                                                                                                                                                                                                                                                                                                                             | 1.3                                                                                                                              |
| <b>Other</b>                                                     | Included for CSF proteomics analysis.                                                                                                                                                       | ..                      |                         | Included for CSF proteomics analysis.                                                                                                                                                                                                                                                                                                                           | Included for CSF proteomics analysis.                                                                                            |

| <b>Patient</b>                                     | <b>#21</b>                                         | <b>#22</b>                                 | <b>#23</b>              | <b>#24</b>                                                                 | <b>#25</b>                    |
|----------------------------------------------------|----------------------------------------------------|--------------------------------------------|-------------------------|----------------------------------------------------------------------------|-------------------------------|
| <b>Age (years)</b>                                 | 65                                                 | 73                                         | 78                      | 62                                                                         | 83                            |
| <b>Sex</b>                                         | M                                                  | M                                          | M                       | M                                                                          | M                             |
| <b>Hospitalisation period (days)</b>               | 58                                                 | 142                                        | 134                     | 64                                                                         | 53                            |
| <b>Disease severity (score)</b>                    | Severe (7)                                         | Dead (8)                                   | Dead (8)                | Severe (7)                                                                 | Dead (8)                      |
| <b>Chest CT Covid-19 pulmonary involvement (%)</b> | < 25                                               | < 25                                       | 0                       | < 25                                                                       | 50-75                         |
| <b>Blood analysis</b>                              |                                                    |                                            |                         |                                                                            |                               |
| <b>C-Reactive Protein (mg/dl)</b>                  | 2.1                                                | 4.6                                        | <b>39.8</b>             | 2.3                                                                        | 13.8                          |
| <b>D-dimer (ng/ml)</b>                             | <b>4348.7</b>                                      | <b>2278</b>                                | <b>2213</b>             | <b>7397</b>                                                                | <b>4372</b>                   |
| <b>Comorbidities</b>                               | Hypertension, diabetes, and chronic renal disease. | Diabetes, AIDS/HIV, and CHIKV arthropathy. | Diabetes, dyslipidemia, | Hypertension, congenital heart disease, chronic renal disease, and stroke. | Hypertension, arrhythmia, and |

|                                                                  |                                                                                                                                                                                  |                                                                                                                                                                        |                                                                                                                                                                                                             |                                                                                                                                                                                                                                                                          |                                                                                                                                                                                                                                                            |
|------------------------------------------------------------------|----------------------------------------------------------------------------------------------------------------------------------------------------------------------------------|------------------------------------------------------------------------------------------------------------------------------------------------------------------------|-------------------------------------------------------------------------------------------------------------------------------------------------------------------------------------------------------------|--------------------------------------------------------------------------------------------------------------------------------------------------------------------------------------------------------------------------------------------------------------------------|------------------------------------------------------------------------------------------------------------------------------------------------------------------------------------------------------------------------------------------------------------|
|                                                                  |                                                                                                                                                                                  |                                                                                                                                                                        | hyperuricemia, and stroke.                                                                                                                                                                                  |                                                                                                                                                                                                                                                                          | chronic obstructive pulmonary disease.                                                                                                                                                                                                                     |
| <b>Neurological symptoms at admission</b>                        | Fatigue/malaise and nausea/vomiting.                                                                                                                                             | Altered level of consciousness and somnolence.                                                                                                                         | Somnolence, bradypsychism, and paresthesia.                                                                                                                                                                 | Altered level of consciousness, adynamia, somnolence, fatigue/malaise, nausea/vomiting, and hemiparesis.                                                                                                                                                                 | None.                                                                                                                                                                                                                                                      |
| <b>Clinical complaint/complication during hospitalisation</b>    | Psychomotor agitation, altered level of consciousness, prostration, paresis, motor disturbance, bradypsychism, and cognitive deficits. Sepsis, acute renal failure, and anaemia. | Coma, pharmacodermia, bacterial pneumonia, tachycardia, venous thrombosis, sepsis, acute renal failure, and non-controlled diabetes.                                   | Seizures, disorientation, prostration, and bradypsychism. Cardiogenic shock, sepsis, thoracic surgery.                                                                                                      | Seizures. Bacterial pneumonia, tracheobronchitis, sepsis.                                                                                                                                                                                                                | Myopathy. Bacterial pneumonia, pleural effusion, rhabdomyolysis, sepsis, acute hepatic and renal failure, and cardiac arrest.                                                                                                                              |
| <b>Clinical indication for CSF analysis</b>                      | Suspected encephalitis.                                                                                                                                                          | Encephalopathy post-COVID.                                                                                                                                             | Coma investigation and suspected encephalitis.                                                                                                                                                              | Seizures and suspected encephalitis.                                                                                                                                                                                                                                     | Coma investigation.                                                                                                                                                                                                                                        |
| <b>Neurological diagnosis</b>                                    | <b>Encephalopathy</b>                                                                                                                                                            | <b>Encephalopathy</b>                                                                                                                                                  | <b>Encephalopathy, stroke and refractory status epilepticus</b>                                                                                                                                             | <b>Stroke</b>                                                                                                                                                                                                                                                            | <b>Multiple strokes and myopathy</b>                                                                                                                                                                                                                       |
| <b>Neuroimaging findings for COVID-19 and imaging modalities</b> | NEGATIVE<br><br>Brain CT, contrast-enhanced. Mild optic nerves enlarged subarachnoid space.                                                                                      | NEGATIVE<br><br>Brain CT, non-enhanced. Brain MR, contrast-enhanced. Mild enlarged Meckel caves. Hydrocephalus (Evans index 0,34) with probable transependymal oedema. | PRONOUNCED<br><br>Brain CT, contrast-enhanced. Brain MR, non-enhanced. Subacute ischemic stroke. Mild signs of intracranial hypertension (slight optic nerves tortuosity with enlarged subarachnoid space). | PRONOUNCED<br><br>Brain CT, non-enhanced. Brain MR, contrast-enhanced. Brain encephalomalacia with hemosiderin deposition. Chronic brain lesions related to vascular disease. Enhancing hemorrhagic stroke. Mild signs of intracranial hypertension (slight optic nerves | PRONOUNCED<br><br>Brain CT, non-enhanced. Brain MR, contrast-enhanced. Multiple acute brain ischaemic lesions, some in the watershed territory. Mild signs of intracranial hypertension (slight optic nerves tortuosity with enlarged subarachnoid space). |



|                                     |                                               |     |                                       |                                       |                                       |
|-------------------------------------|-----------------------------------------------|-----|---------------------------------------|---------------------------------------|---------------------------------------|
|                                     | tortuosity with enlarged subarachnoid space). |     |                                       |                                       |                                       |
| <b>CSF analysis</b>                 |                                               |     |                                       |                                       |                                       |
| <b>WBC cells/mm<sup>3</sup></b>     | 1                                             | 1   | 9                                     | 2                                     | 1                                     |
| <b>Protein mg/dL</b>                | 46                                            | 25  | 35                                    | 39                                    | 46                                    |
| <b>Glucose mg/dL</b>                | 66                                            | 77  | 74                                    | 58                                    | 95                                    |
| <b>IL6 pg/mL</b>                    | 8.1                                           | 0.7 | 4.2                                   | 828.7                                 | 7.4                                   |
| <b>TNF<math>\alpha</math> pg/mL</b> | 0.9                                           | 1.9 | 1.9                                   | 5.05                                  | 3.4                                   |
| <b>Other</b>                        | Included for CSF proteomics analysis.         | ..  | Included for CSF proteomics analysis. | Included for CSF proteomics analysis. | Included for CSF proteomics analysis. |

| <b>Patient</b>                                     | <b>#26</b>                                                        | <b>#27</b>                                                                                       | <b>#28</b>                                           | <b>#29</b>                                  | <b>#30</b>                                                  |
|----------------------------------------------------|-------------------------------------------------------------------|--------------------------------------------------------------------------------------------------|------------------------------------------------------|---------------------------------------------|-------------------------------------------------------------|
| <b>Age (years)</b>                                 | 69                                                                | 29                                                                                               | 26                                                   | 56                                          | 61                                                          |
| <b>Sex</b>                                         | M                                                                 | F                                                                                                | F                                                    | f                                           | M                                                           |
| <b>Hospitalisation period (days)</b>               | 36                                                                | 23                                                                                               | 2                                                    | 5                                           | 138                                                         |
| <b>Disease severity (score)</b>                    | Severe (6)                                                        | Dead (8)                                                                                         | Mild (3)                                             | Mild (3)                                    | Severe (7)                                                  |
| <b>Chest CT Covid-19 pulmonary involvement (%)</b> | < 25                                                              | < 25                                                                                             | 0                                                    | 25-50                                       | 25-50                                                       |
| <b>Blood analysis</b>                              |                                                                   |                                                                                                  |                                                      |                                             |                                                             |
| <b>C-Reactive Protein (mg/dl)</b>                  | 24.9                                                              | 2.55                                                                                             | 0.03                                                 | 0.7                                         | 2.5                                                         |
| <b>D-dimer (ng/ml)</b>                             | 1240                                                              | 1274                                                                                             | 274,25                                               | 2701.8                                      | 680                                                         |
| <b>Comorbidities</b>                               | Hypothyroidism, bladder cancer, and chronic renal disease.        | Epilepsy and systemic lupus erythematosus.                                                       | Post-trauma chronic headache and asthma.             | None.                                       | Lymphoma and chronic immunosuppressor use.                  |
| <b>Neurological symptoms at admission</b>          | Seizures, altered level of consciousness/ confusion, and paresis. | Disorientation, refractory status epilepticus, amaurosis, paresis, tremor and dysdiadochokinesia | Headache, altered level of consciousness/ confusion. | Paresthesia, paraparesis, facial paralysis. | Ageusia, fatigue/malaise, nausea/vomiting, and prostration. |

|                                                                  |                                                                                                                                          |                                                                                                                                                                                                                                    |                                                                                                                                                                    |                                                                                                                                                                            |                                                                                                                                                                                                                                                     |
|------------------------------------------------------------------|------------------------------------------------------------------------------------------------------------------------------------------|------------------------------------------------------------------------------------------------------------------------------------------------------------------------------------------------------------------------------------|--------------------------------------------------------------------------------------------------------------------------------------------------------------------|----------------------------------------------------------------------------------------------------------------------------------------------------------------------------|-----------------------------------------------------------------------------------------------------------------------------------------------------------------------------------------------------------------------------------------------------|
| <b>Clinical complaint/complication during hospitalisation</b>    | Seizures.                                                                                                                                | Seizures. Ventricular arrhythmia, acute renal failure.                                                                                                                                                                             | Facial paralysis.                                                                                                                                                  | Paresthesia, paraparesis.                                                                                                                                                  | Delirium, agitation, altered level of consciousness, anorexia, insomnia, anxiety, depression, prostration, speech problems, hearing impairment, and miosis. Bacterial pneumonia, fibrosis and pulmonary thromboembolism, venous thrombosis, sepsis. |
| <b>Clinical indication for CSF analysis</b>                      | Paresis and seizures.                                                                                                                    | Suspected encephalitis.                                                                                                                                                                                                            | Facial paralysis.                                                                                                                                                  | Suspected Guillain-Barré syndrome.                                                                                                                                         | Altered level of consciousness.                                                                                                                                                                                                                     |
| <b>Neurological diagnosis</b>                                    | Undetermined                                                                                                                             | <b>Central nervous system vasculitis and refractory status epilepticus</b>                                                                                                                                                         | <b>Peripheral facial paralysis</b>                                                                                                                                 | <b>Guillain-Barré syndrome</b>                                                                                                                                             | <b>Probable cranial neuropathy</b>                                                                                                                                                                                                                  |
| <b>Neuroimaging findings for COVID-19 and imaging modalities</b> | PRONOUNCED<br><br>Brain CT, non-enhanced.<br>Extensive right parieto-occipital ischemic stroke.<br>Small left occipital ischemic stroke. | PRONOUNCED<br>Brain CT and MR, contrast-enhanced.<br>Cerebral MR angiography.<br>Encephalitis and ischemic stroke. Mild signs of intracranial hypertension (slight optic nerves enlarged subarachnoid space; partial empty sella). | PRONOUNCED<br><br>Brain CT, non-enhanced. Brain CT enhanced angiography. Subtle non-enhancing white matter hypodensities not expected for the patient's age group. | PRONOUNCED<br>Brain CT, non-enhanced.<br>Brain and spine MR, contrast-enhanced.<br>Possible non-enhancing demyelinating lesions.<br>No signs of intracranial hypertension. | NEGATIVE<br><br>Brain CT, non-enhanced. Brain MR, contrast-enhanced.                                                                                                                                                                                |
| <b>CSF analysis</b>                                              |                                                                                                                                          |                                                                                                                                                                                                                                    |                                                                                                                                                                    |                                                                                                                                                                            |                                                                                                                                                                                                                                                     |
| <b>WBC cells/mm<sup>3</sup></b>                                  | 2                                                                                                                                        | 4                                                                                                                                                                                                                                  | 1                                                                                                                                                                  | 5                                                                                                                                                                          | 1                                                                                                                                                                                                                                                   |
| <b>Protein mg/dL</b>                                             | 49                                                                                                                                       | 22                                                                                                                                                                                                                                 | 26                                                                                                                                                                 | 30                                                                                                                                                                         | 40                                                                                                                                                                                                                                                  |
| <b>Glucose mg/dL</b>                                             | 105                                                                                                                                      | 52                                                                                                                                                                                                                                 | 68                                                                                                                                                                 | 52                                                                                                                                                                         | 92                                                                                                                                                                                                                                                  |
| <b>IL6 pg/mL</b>                                                 | 67.1                                                                                                                                     | 63.7                                                                                                                                                                                                                               | 1.95                                                                                                                                                               | 6.3                                                                                                                                                                        | 185.5                                                                                                                                                                                                                                               |
| <b>TNFα pg/mL</b>                                                | 3.1                                                                                                                                      | 2.5                                                                                                                                                                                                                                | 4.2                                                                                                                                                                | 2.2                                                                                                                                                                        | 2.9                                                                                                                                                                                                                                                 |
| <b>Other</b>                                                     | ..                                                                                                                                       | ..                                                                                                                                                                                                                                 | ..                                                                                                                                                                 | ..                                                                                                                                                                         | ..                                                                                                                                                                                                                                                  |

| Patient                                                   | #31                                                                     | #32                                                                                        | #33                                                         | #34                                                                   | #35                                                                                                                         |
|-----------------------------------------------------------|-------------------------------------------------------------------------|--------------------------------------------------------------------------------------------|-------------------------------------------------------------|-----------------------------------------------------------------------|-----------------------------------------------------------------------------------------------------------------------------|
| Age (years)                                               | 34                                                                      | 87                                                                                         | 60                                                          | 31                                                                    | 75                                                                                                                          |
| Sex                                                       | M                                                                       | M                                                                                          | M                                                           | M                                                                     | M                                                                                                                           |
| Hospitalisation period (days)                             | 8                                                                       | 10                                                                                         | 69                                                          | 40                                                                    | 34                                                                                                                          |
| Disease severity (score)                                  | Mild (4)                                                                | Mild (4)                                                                                   | Severe (6)                                                  | Severe (7)                                                            | Dead (8)                                                                                                                    |
| Chest CT Covid-19 pulmonary involvement (%)               | 25-50                                                                   | < 25                                                                                       | 25-50                                                       | < 25                                                                  | > 75                                                                                                                        |
| <b>Blood analysis</b>                                     |                                                                         |                                                                                            |                                                             |                                                                       |                                                                                                                             |
| C-Reactive Protein (mg/dl)                                | 14.9                                                                    | 0.8                                                                                        | 19.9                                                        | 3.9                                                                   | 34.16                                                                                                                       |
| D-dimer (ng/ml)                                           | 535                                                                     | 1478                                                                                       | 2530.3                                                      | 6148                                                                  | 3036                                                                                                                        |
| Comorbidities                                             | None.                                                                   | Hypertension, coronary artery disease and coronary artery bypass surgery.                  | Chronic heart disease, coronary disease, and heart failure. | Hypertension, vitiligo.                                               | Hypertension, coronary disease, heart attack, and gout.                                                                     |
| Neurological symptoms at admission                        | Fatigue/malaise.                                                        | Confusion/altered level of consciousness, psychomotor agitation, seizures, and dysarthria. | None.                                                       | None.                                                                 | Fatigue/malaise.                                                                                                            |
| Clinical complaint/complication during hospitalisation    | Facial paralysis.                                                       | Seizures.                                                                                  | None.                                                       | Seizures, atrial fibrillation, acute renal failure.                   | Bacterial pneumonia, acute respiratory distress syndrome, coagulopathy, sepsis, acute renal failure, cardiac arrest.        |
| Clinical indication for CSF analysis                      | Suspected encephalitis.                                                 | Suspected encephalitis.                                                                    | Suspected encephalitis.                                     | Suspected Guillain-Barré Syndrome.                                    | Fever and suspected encephalitis/meningitis                                                                                 |
| Neurological diagnosis                                    | Undetermined                                                            | Undetermined                                                                               | Undetermined                                                | Undetermined                                                          | Undetermined                                                                                                                |
| Neuroimaging findings for COVID-19 and imaging modalities | NEGATIVE<br>Brain CT, non-enhanced.<br><br>Brain MR, contrast-enhanced. | NEGATIVE<br>Brain CT, non-enhanced.                                                        | NEGATIVE<br>Brain CT, non-enhanced.                         | MODERATE<br>Brain CT, non-enhanced<br><br>Brain MR, contrast-enhanced | MODERATE<br>Brain CT, non-enhanced<br><br>Signs of intracranial hypertension (enlarged Meckel caves; optic nerves enlarged) |

|                                     |                                          |                                          |           |                                                                                                                                                                   |                                              |
|-------------------------------------|------------------------------------------|------------------------------------------|-----------|-------------------------------------------------------------------------------------------------------------------------------------------------------------------|----------------------------------------------|
|                                     |                                          |                                          |           |                                                                                                                                                                   | subarachnoid space;<br>partial empty sella). |
|                                     | Enlarged Meckel caves.                   |                                          |           | Cerebral MR<br>angiography.<br>Mild signs of<br>intracranial hypertension<br>(slightly enlarged<br>Meckel caves; optic<br>nerves enlarged<br>subarachnoid space). |                                              |
| <b>CSF analysis</b>                 |                                          |                                          |           |                                                                                                                                                                   |                                              |
| <b>WBC cells/mm<sup>3</sup></b>     | 2                                        | 1                                        | 2         | 1                                                                                                                                                                 | 2                                            |
| <b>Protein mg/dL</b>                | 33                                       | 3                                        | <b>47</b> | <b>41</b>                                                                                                                                                         | 24                                           |
| <b>Glucose mg/dL</b>                | <b>91</b>                                | 62                                       | 64        | 57                                                                                                                                                                | 55                                           |
| <b>IL6 pg/mL</b>                    | 6.8                                      | 17.4                                     | 261.4     | 22.1                                                                                                                                                              | 6.9                                          |
| <b>TNF<math>\alpha</math> pg/mL</b> | 1.1                                      | 1.6                                      | 2.7       | 2.8                                                                                                                                                               | 2.0                                          |
| <b>Other</b>                        | Included for CSF<br>proteomics analysis. | Included for CSF<br>proteomics analysis. | ..        | ..                                                                                                                                                                | Included for CSF<br>proteomics analysis.     |

Only main symptoms and complications are described. Abbreviations: (M) male, (F) female, (CT) computed tomography, (SII) systemic inflammatory index, (MR) magnetic resonance, (IL6) interleukin-6; (TNF $\alpha$ ) tumour necrosis factor-alpha; (CSF) cerebrospinal fluid; (WBC), white blood cells. Bold values represent values outside reference levels: C-reactive protein  $\geq$  15 mg/dL<sup>13</sup>; D-dimer  $\geq$  1500 ng/mL<sup>13</sup>; CSF WBC > 5 cells/mm<sup>3</sup>; CSF protein > 40 mg/dL; CSF glucose > 80 mg/dL. NA, not-available. (..) Non-applicable.

\*Case reported at a previous publication (Freitas et al, 2021).

Suppl. Table 3. CSF laboratory analysis in COVID-19 and non-infected control patients.

|                                                             | COVID-19     | Non-infectious control (NPH) | Odds ratio (p-value) |
|-------------------------------------------------------------|--------------|------------------------------|----------------------|
| Number of individuals (n)                                   | 35           | 10                           | ..                   |
| Age [years], mean (SD)                                      | 55.6 (17.0)  | 78.6 (3.9)                   | <b>(0.0001****)</b>  |
| Sex, male (%)                                               | 23 (65.7)    | 4 (40.0)                     | 2.9 (0.166)          |
| CSF analysis                                                |              |                              |                      |
| Opening pressure [cmH <sub>2</sub> O], mean (N° above 20/n) | 20.2 (13/34) | 12.9 (1/10)                  | <b>(0.005**)</b>     |
| RBC count [cells/mm <sup>3</sup> ], median (IQR)            | 26.0 (1-103) | 1.5 (1-13.8)                 | (0.086)              |
| WBC count [cells/mm <sup>3</sup> ], median (N° above 5)     | 1.0 (3)      | 1.0 (0)                      | (0.051)              |
| CSF Proteins [mg/dL], mean (N° above 40)                    | 37.4 (12)    | 34.7 (1)                     | (0.672)              |
| CSF Glucose [mg/dL], median (N° above 80)                   | 63.0 (7)     | 59.5 (2)                     | (0.205)              |
| CSF Lactate [mg/dL], mean (N° above 19/n)                   | 18.2 (3/13)  | NA                           | ..                   |

Normal-pressure hydrocephalus (NPH) CSF samples are used as a non-infectious control group. Categorical variables are expressed as the number of positive cases (N°). Normal distributed continuous variables are expressed as the mean. Non-parametric continuous variables are expressed as the median. \*\*p < 0.01, t-test. \*\*\*\*p < 0.0001, Welch's t-test. (NA) Non-available. (..) Non-applicable. (SD) Standard deviation. (IQR) interquartile range.

Suppl. Table 4. SARS-CoV-2 genome sequencing statistics and classification.

| Sample | Number of raw reads | Number of paired filtered reads | Number of unpaired filtered reads | Number of mapped reads | Efficiency | Average depth | Coverage 10x | Coverage 100x | Coverage 1000x |
|--------|---------------------|---------------------------------|-----------------------------------|------------------------|------------|---------------|--------------|---------------|----------------|
| #3     | 280982              | 272956                          | 2545                              | 272493                 | 0.969788   | 1550.95       | 0.971173     | 0.857105      | 0.545798       |
| #6     | 267754              | 258948                          | 2857                              | 259131                 | 0.967795   | 1519.4        | 0.942514     | 0.777815      | 0.449487       |
| #24    | 229522              | 219722                          | 3274                              | 209219                 | 0.911542   | 1277.54       | 0.968933     | 0.811791      | 0.460991       |
| #12    | 235670              | 220428                          | 5290                              | 169163                 | 0.717796   | 1007.05       | 0.865599     | 0.683711      | 0.363341       |
| #35    | 272654              | 244636                          | 9928                              | 36331                  | 0.133249   | 210.555       | 0.292345     | 0.214427      | 0.0756111      |

Virus isolated from nasopharyngeal swabs.

## Barros-Aragão et al., Suppl. Table 5

### Suppl. Table 5. GISAID EpiCoV database acknowledgments.

We gratefully acknowledge the following Authors from the Originating laboratories responsible for obtaining the specimens, as well as the Submitting laboratories where the genome data were generated and shared via GISAID, on which this research is based.

All Submitters of data may be contacted directly via [www.gisaid.org](http://www.gisaid.org)

Authors are sorted alphabetically.

| Accession ID                                                                                                                                                                                                                                                                                                                                                                                                     | Originating Laboratory                                                         | Submitting Laboratory                                                          | Authors                                                                                                                                                                                                                                                                                                                                                                                                                                                            |
|------------------------------------------------------------------------------------------------------------------------------------------------------------------------------------------------------------------------------------------------------------------------------------------------------------------------------------------------------------------------------------------------------------------|--------------------------------------------------------------------------------|--------------------------------------------------------------------------------|--------------------------------------------------------------------------------------------------------------------------------------------------------------------------------------------------------------------------------------------------------------------------------------------------------------------------------------------------------------------------------------------------------------------------------------------------------------------|
| EPI_ISL_1023833                                                                                                                                                                                                                                                                                                                                                                                                  | Centro de Desenvolvimento Tecnológico em Saúde - CDTS                          | Centro de Desenvolvimento Tecnológico em Saúde - CDTS                          | A.D.; C.Q.; De Paula; F.B.; Ferreira; Fintelman-Rodrigues, N.; M.A. and Sacramento; Saraiva; Souza; T.M.                                                                                                                                                                                                                                                                                                                                                           |
| EPI_ISL_717835, EPI_ISL_717841, EPI_ISL_717912, EPI_ISL_717917, EPI_ISL_717964                                                                                                                                                                                                                                                                                                                                   | LACEN Dr. Francisco Rimolo Neto                                                | Bioinformatics Laboratory / LNCC                                               | Alexandra L Gerber; Amílcar Tanuri; Ana Paula de C Guimarães; Ana Tereza R de Vasconcelos; Andréa Cony Cavalcanti; Carolina M Voloch; Claudia dos Santos Rodrigues; Cynthia C Cardoso; Diana Mariani; Luiz G P de Almeida                                                                                                                                                                                                                                          |
| EPI_ISL_717789, EPI_ISL_717795, EPI_ISL_717796, EPI_ISL_717800, EPI_ISL_717900, EPI_ISL_717902, EPI_ISL_717903, EPI_ISL_717909                                                                                                                                                                                                                                                                                   | LACEN RJ - Noel Nutels                                                         | Bioinformatics Laboratory / LNCC                                               | Alexandra L Gerber; Amílcar Tanuri; Ana Paula de C Guimarães; Ana Tereza R de Vasconcelos; Andréa Cony Cavalcanti; Carolina M Voloch; Claudia dos Santos Rodrigues; Cynthia C Cardoso; Diana Mariani; Luiz G P de Almeida                                                                                                                                                                                                                                          |
| EPI_ISL_2731471                                                                                                                                                                                                                                                                                                                                                                                                  | Laboratório Central de Saúde Pública do Estado do Rio de Janeiro (LACEN/RJ)    | Laboratory of Respiratory Viruses and Measles, Oswaldo Cruz Institute, FIOCRUZ | Alice Sampaio Rocha; Ana Carolina Mendonça; Andrea Cony Cavalcanti; Anna Carolina Paixão; Elisa Cavalcante Pereira; Fernando Motta; Luciana Appolinario; Marilda Siqueira on behalf of the Fiocruz COVID-19 Genomic Surveillance Network                                                                                                                                                                                                                           |
| EPI_ISL_2970373                                                                                                                                                                                                                                                                                                                                                                                                  | Laboratório de Biologia Molecular de Flavivirus, Instituto Oswaldo Cruz        | Laboratório de Biologia Molecular de Flavivirus, Instituto Oswaldo Cruz        | A.A.; B.D.; Bonaldo; Brasil, P.; Damasceno, L.; Furtado; I.P.; L.M.; M.C.; M.P.; Mello, I.; N.D.; Oliveira; Pelajo-Machado, M.; Rhapael; Ribeiro; Santos; Siqueira                                                                                                                                                                                                                                                                                                 |
| EPI_ISL_470638, EPI_ISL_623130, EPI_ISL_717810, EPI_ISL_717811, EPI_ISL_717848, EPI_ISL_717852, EPI_ISL_717859, EPI_ISL_717866                                                                                                                                                                                                                                                                                   | Laboratório de Virologia Molecular / UFRJ                                      | Bioinformatics Laboratory / LNCC                                               | Alexandra Gerber; Alexandra L Gerber; Amílcar Tanuri; Ana Paula Guimarães; Ana Paula de C Guimarães; Ana Tereza R de Vasconcelos; Andréa Cony Cavalcanti; CADDE-group; Carolina M Voloch; Carolina Voloch; Claudia dos Santos Rodrigues; Renata Santana Aguiar e Ana Tereza Vasconcelos; Ronaldo S Francisco Jr; Ronaldo da Silva F Jr; Ronaldo da Silva Francisco Junior; Terezinha M P P Castilheira; Terezinha M P P Castilheiras; Terezinha Maria F de Almeida |
| EPI_ISL_467356, EPI_ISL_467359, EPI_ISL_467366, EPI_ISL_541354, EPI_ISL_541355, EPI_ISL_541359, EPI_ISL_1181361, EPI_ISL_1181384, EPI_ISL_1181499, EPI_ISL_1181500, EPI_ISL_1181508, EPI_ISL_1181509, EPI_ISL_1181510, EPI_ISL_1181512, EPI_ISL_1181513, EPI_ISL_1181518, EPI_ISL_1181521, EPI_ISL_1181524, EPI_ISL_2731476, EPI_ISL_2731478, EPI_ISL_2731480, EPI_ISL_2731481, EPI_ISL_2731482, EPI_ISL_2731486 | Laboratory of Respiratory Viruses and Measles, Oswaldo Cruz Institute, FIOCRUZ | Laboratory of Respiratory Viruses and Measles, Oswaldo Cruz Institute, FIOCRUZ | Alex Pauvolid-Corrêa; Alice Sampaio Rocha; Aline Mattos; Ana Beatriz Machado Lima; Ana Carolina Mendonça; Ana Carolina Mendonça; Anna Carolina Paixão; Anna Carolina Paixão; Bráulia Caetano; Cinthia Avila; Cristiana Garcia; Ogrzewalska; Marilda Siqueira on behalf of the Fiocruz COVID-19 Genomic Surveillance Network; Mia Ferreira de Araujo; Milene Miranda; Paola Resende; Renata Serrano Lacerda                                                         |
| EPI_ISL_456088                                                                                                                                                                                                                                                                                                                                                                                                   | Laboratório Central de Saúde Pública Noel Nutels (LACEN-RJ)                    | Laboratory of Respiratory Viruses and Measles, Oswaldo Cruz Institute, FIOCRUZ | Aline Mattos; Bráulia Caetano; Cristiana Garcia; Fernando Motta; Jonathan Lopes; Luciana Appolinario; Maria Ogrzewalska; Marilda Siqueira on behalf of the Fiocruz COVID-19 Genomic Surveillance Network                                                                                                                                                                                                                                                           |
| EPI_ISL_513514, EPI_ISL_513532, EPI_ISL_513546, EPI_ISL_513557                                                                                                                                                                                                                                                                                                                                                   | Programa de Oncovirologia, Instituto Nacional de Câncer                        | Programa de Oncovirologia, Instituto Nacional de Câncer                        | Andria C. de Melo; Brunna M. Alves; Claudia Cicala; James Arthos; João P.B. Viola; Juliana D. Siqueira; Livia R. Goes; Marcelo A. Soares                                                                                                                                                                                                                                                                                                                           |
